# Supplementary material for: Identification of the cytochrome P450 enzymes involved in the oxidative metabolism of trantinterol using ultra high-performance liquid chromatography coupled with tandem mass spectrometry
Source: Royal Society of Chemistry journal article supplement (doi:10.1039/c8ra06219f), 2018-01-01
Supplement: c8ra06219f1.pdf [file c8ra06219f1.pdf]

Identification of the cytochrome P450 enzymes involved in the oxidative metabolism of trantinterol  
using ultra high-performance liquid chromatography coupled with tandem mass spectrometry

Kunjie Li, Xingjie Guo, Feng Qin, Zhili Xiong, Longshan Zhao\*, Jia Yu\*

Department of Analytical Chemistry, School of Pharmacy, Shenyang Pharmaceutical University, 103  
Wenhua Road, Shenyang 110016, China

Corresponding author 1: Jia Yu. Tel./Fax.: +86-24-2398-6285; E-mail address: yujia\_yc@163.com.

Corresponding author 2: Longshan Zhao. Tel./Fax.: 86-24-23986421; E-mail: longshanzhao@163.com.

**Table S1** Summary of accuracy, intra- and inter-assay precision from QCs in human liver microsomes and cDNA-expressed P450 enzymes.

| Analytes       | Added <i>C</i><br>(ng/mL) | Found <i>C</i><br>(ng/mL) | Relative<br>error (%) | Intra-run <i>RSD</i><br>(%) | Inter-run <i>RSD</i><br>(%) |
|----------------|---------------------------|---------------------------|-----------------------|-----------------------------|-----------------------------|
| <b>In HLMs</b> |                           |                           |                       |                             |                             |
| M1             | 9.640                     | 9.642                     | 0.0                   | 5.8                         | 9.6                         |
|                | 23.13                     | 25.32                     | 9.5                   | 3.9                         | 3.6                         |
|                | 241.0                     | 243.2                     | 0.9                   | 6.0                         | 4.9                         |
|                | 2410                      | 2090                      | -13                   | 2.7                         | 7.1                         |
| M2             | 1.843                     | 1.830                     | -0.7                  | 5.1                         | 12                          |
|                | 3.072                     | 3.262                     | 6.2                   | 6.7                         | 11                          |
|                | 32.77                     | 34.13                     | 4.2                   | 2.9                         | 5.7                         |
|                | 384.0                     | 365.6                     | -4.8                  | 2.9                         | 8.2                         |
| <b>In CYPs</b> |                           |                           |                       |                             |                             |
| M1             | 9.640                     | 9.824                     | 1.9                   | 5.1                         | 8.5                         |
|                | 23.13                     | 25.89                     | 12                    | 2.5                         | 10                          |
|                | 241.0                     | 255.4                     | 6.0                   | 3.3                         | 3.4                         |
|                | 2410                      | 2115                      | -12                   | 2.9                         | 1.2                         |
| M2             | 1.843                     | 1.848                     | 0.3                   | 8.7                         | 11                          |
|                | 3.072                     | 3.084                     | 0.4                   | 5.9                         | 3.4                         |
|                | 32.77                     | 34.44                     | 5.1                   | 3.1                         | 5.2                         |
|                | 384.0                     | 361.4                     | -5.9                  | 5.1                         | 8.3                         |

**Table S2** Stabilities of M1 and M2 in human liver microsomes and cDNA-expressed P450 enzymes.

| Storage conditions                 | Analytes | Added <i>C</i><br>(ng/mL) | Found <i>C</i><br>(ng/mL) | <i>RE</i> (%) | <i>RSD</i> (%) |
|------------------------------------|----------|---------------------------|---------------------------|---------------|----------------|
| <b>In HLMs</b>                     |          |                           |                           |               |                |
| Post-preparative<br>(4°C for 12 h) | M1       | 23.13                     | 25.36                     | 9.7           | 7.4            |
|                                    |          | 2410                      | 2105                      | -13           | 2.4            |
|                                    | M2       | 3.072                     | 2.809                     | -8.6          | 10             |
|                                    |          | 384.0                     | 373.5                     | -2.7          | 6.1            |
| Incubation for<br>40 min           | M1       | 23.13                     | 25.65                     | 11            | 3.5            |
|                                    |          | 2410                      | 2057                      | -15           | 0.3            |
|                                    | M2       | 3.072                     | 3.145                     | 2.4           | 6.0            |
|                                    |          | 384.0                     | 358.9                     | -6.5          | 3.0            |
| <b>In CYPs</b>                     |          |                           |                           |               |                |
| Post-preparative<br>(4°C for 12 h) | M1       | 23.13                     | 26.36                     | 14            | 1.8            |
|                                    |          | 2410                      | 2117                      | -12           | 1.5            |
|                                    | M2       | 3.072                     | 3.026                     | -1.5          | 1.2            |
|                                    |          | 384.0                     | 349.3                     | -9.0          | 5.6            |
| Incubation for<br>40 min           | M1       | 23.13                     | 25.93                     | 12            | 3.1            |
|                                    |          | 2410                      | 2195                      | -8.9          | 1.3            |
|                                    | M2       | 3.072                     | 3.117                     | 1.5           | 6.0            |
|                                    |          | 384.0                     | 381.9                     | -0.5          | 4.6            |
